# Supplementary material for: The impact of multimorbidity on health‑related quality of life among older adults in China: a longitudinal study
Source: Research Square preprint supplement (doi:10.21203/rs.3.rs-7073238/v1), 2025-08-19
Supplement: Supplementary file 1 [file ba0943a6f65b6eb77fa9203b.docx]

**Attachment**

**A 1 The correspondence between the selected CHARLS questions and the EQ-5D-3L dimensions**

| **EQ-5D-3L dimensions** | **Questions of CHARLS（2018）** | **CHARLS questionnaire mapped to the EQ-5D-3L dimensions** | **Score of dimensions** |
| --- | --- | --- | --- |
| **Mobility**  A. no problems  B. some problems  C. extreme problems | **DA051_1a** Please recall the Vigorous-intensity activity\ Moderate activity\ Mild activities that you have taken part in for at least 10 minutes every time in a week.(Vigorous activities can cause shortness of breath. Examples of vigorous-intensity activities include carrying heavy stuff, digging, hoeing, aerobic workout, bicycling at a fast speed, riding a cargo bike/motorcycle, etc.)  1. Yes 2. No | **Level b**  **A. no problems**  DA051_1, DA051_2, DA051_3 all selected “Yes”  **B. some problems**  If any of DA051_1, DA051_2, or DA051_3 selects "Yes" and DB013 selected "I have difficulty but can still do it".  **C. extreme problems**  If DA051_1, DA051_2, and DA051_3 all selected "No" and DB013 selects either "I cannot do it" or "Yes, I have difficulty and need help". | "no problems" scored 0  "some problems" scored 0.0766  "extreme problems" scored 0. 2668  **The score for mobility was either 0, 0.076, or 0.2668*.** |
| **DA051_2** Please recall the Moderate activity that you have taken part in for at least 10 minutes every time in a week.  (Moderate activities can make you breathe faster than usual. Examples of moderate activities include carrying light stuff, bicycling at a normal speed, mopping, Tai-Chi, and speed walking)  1. Yes 2. No |
| **DA051_3** Please recall the Mild activities that you have taken part in for at least 10 minutes every time in a week.  (Mild activities such as walking from one place to another place at a workplace or home, and taking a walk for leisure, sports, exercise or entertainment)  1.Yes 2.No |
| **DB013** Do you have any difficulty with getting into or out of bed?  1. No, I don’t have any difficulty  2. I have difficulty but can still do it  3. Yes, I have difficulty and need help  4. I cannot do it |
| **Self-Care**  A. no problems  B. some problems  C. extreme problems | **DB010** Do you have any difficulty with dressing?  1. No, I don’t have any difficulty  2. I have difficulty but can still do it  3. Yes, I have difficulty and need help  4. I cannot do it | **A. no problems**  If question from CHARLS applies, selected “1. No, I don’t have any difficulty.”  **B. some problems**  If any question from CHARLS applies, selected “2. I have difficulty but can still do it” or “3. Yes, I have difficulty and need help”.  **C. extreme problems**  If question from CHARLS applies, selected “4. I cannot do it”. | "no problems" scored 0  "some problems" scored 0.0441  "extreme problems" scored 0. 2912  **Self-Care scores#= DB010 score+ DB011score+ DB012 score+ DB014 score** |
| **DB011** Do you have any difficulty with bathing or showering?  1. No, I don’t have any difficulty  2. I have difficulty but can still do it  3. Yes, I have difficulty and need help  4. I cannot do it |
| **DB012** Do you have any difficulty with eating?  1. No, I don’t have any difficulty  2. I have difficulty but can still do it  3. Yes, I have difficulty and need help  4. I cannot do it |
| **DB014** Do you have any difficulties with using the toilet.  1. No, I don’t have any difficulty  2. I have difficulty but can still do it  3. Yes, I have difficulty and need help  4. I cannot do it |
| **Usual Activities**  A. no problems  B. some problems  C. extreme problems | **DB016** Do you have any difficulties with doing household chores?  1. No, I don’t have any difficulty  2. I have difficulty but can still do it  3. Yes, I have difficulty and need help  4. I cannot do it | **A. no problems**  If question from CHARLS applies, selected “1. No, I don’t have any difficulty”.  **B. some problems**  If question from CHARLS applies, selected “2. I have difficulty but can still do it” **or**“3. Yes, I have difficulty and need help”.  **C. extreme problems**  If question from CHARLS applies, selected “4. I cannot do it”. | "no problems" scored 0  "some problems" scored 0.0370  "extreme problems" scored 0.0538  **Usual Activities scores#= DB016 score+ DB017 score+ DB018 score+ DB019 score** |
| **DB017** Do you have any difficulties with preparing hot meals?  1. No, I don’t have any difficulty  2. I have difficulty but can still do it  3. Yes, I have difficulty and need help  4. I cannot do it |
| **DB018** Do you have any difficulties with shopping for groceries?  1. No, I don’t have any difficulty  2. I have difficulty but can still do it  3. Yes, I have difficulty and need help  4. I cannot do it |
| **DB019** Do you have any difficulties with managing your money?  1. No, I don’t have any difficulty  2. I have difficulty but can still do it  3. Yes, I have difficulty and need help  4. I cannot do it |
| **Pain/ Discomfort**  A. no problems  B. some problems  C. extreme problems | **DA041_W4** Are you often troubled with anybody pains?  1. None  2. A little  3. Somewhat  4. Quite a bit  5. Very | **A. no problems**  If question from CHARLS applies, selected “1. None”.  **B. some problems**  If question from CHARLS applies, selected “2. A little” **or**“3. Somewhat”.  **C. extreme problems**  If question from CHARLS applies, selected “4. Quite a bit” **or** “5.Very”. | "no problems" scored 0  "some problems" scored 0.0274  "extreme problems" scored 0.0409  **The pain/ discomfort score for was either 0, 0.0274, or 0.0409*.** |
| **Anxiety/Depression**  A. no problems  B. some problems  C. extreme problems | **DC009** I was bothered by things that don’t usually bother me.  1. Rarely or none of the time  2. Some or a little of the time  3. Occasionally or a moderate amount of the time  4. Most or all of the time | **A. no problems**  If question from CHARLS applies, selected“1. Rarely or none of the time”**.**  **B. some problems**  If question from CHARLS applies, selected “2. Some or a little of the time” **or** “3. Occasionally or a moderate amount of the time”.  **C. extreme problems**  If question from CHARLS applies, selected “4. Most or all of the time”. | "no problems" scored 0  "some problems" scored 0.0539  "extreme problems" scored 0.1771  **Anxiety/Depression score# = DC009 score+ DC010 score+ DC011 score+ DC014 score+ DC017 score** |
| **DC010** I had trouble keeping my mind on what I was doing.  1. Rarely or none of the time  2. Some or a little of the time  3. Occasionally or a moderate amount of the time  4. Most or all of the time |
| **DC011** I felt depressed.  1. Rarely or none of the time  2. Some or a little of the time  3. Occasionally or a moderate amount of the time  4. Most or all of the time |
| **DC014** I felt fearful.  1. Rarely or none of the time  2. Some or a little of the time  3. Occasionally or a moderate amount of the time  4. Most or all of the time |
| **DC017** I felt lonely.  1. Rarely or none of the time  2. Some or a little of the time  3. Occasionally or a moderate amount of the time  4. Most or all of the time |

**Note:** EQ-5D-3L: EuroQol Five-Dimension Three-Level Questionnaire

CHARLS: China Health and Retirement Longitudinal Study

a: Code of CHARLS questions

b: The CHARLS questionnaire was mapped to the EQ-5D-3L dimensions, and the final levels for each dimension used in this study were established following the integration process.

*：The scores for mobility and pain/discomfort directly reflected the level scores of their respective single-question measures.

#：The scores for self-care, usual activities, and anxiety/depression were calculated as the sum of their respective question scores, as each dimension was measured by multiple questions.
